# Supplementary material for: Participation Dynamics in Population-Based Longitudinal HIV Surveillance in Rural South Africa
Source: PubMed Central journal article supplement (PMC4395370; doi:10.1371/journal.pone.0123345), 2015-04-13
Supplement: pone.0123345.s001.pdf [file pone.0123345.s001.pdf]

**S1 Table. Distribution of participants by sequence length**

| <b>Sequence length</b> | <b>Frequency</b> | <b>Proportion of person (%)</b> | <b>Proportion of eligibilities (%)</b> |
|------------------------|------------------|---------------------------------|----------------------------------------|
| 1                      | 13,042           | 21.4                            | 5.3                                    |
| 2                      | 8,455            | 13.9                            | 6.8                                    |
| 3                      | 8,568            | 14.1                            | 10.4                                   |
| 4                      | 5,837            | 9.6                             | 9.4                                    |
| 5                      | 6,151            | 10.1                            | 12.4                                   |
| 6                      | 7,103            | 11.7                            | 17.2                                   |
| 7                      | 3,843            | 6.3                             | 10.9                                   |
| 8                      | 3,711            | 6.1                             | 12.0                                   |
| 9                      | 4,244            | 7.0                             | 15.5                                   |
| Total                  | 60,954           | 100.0                           | 100.0                                  |
